# Supplementary material for: Serotype-Specific Changes in Invasive Pneumococcal Disease after Pneumococcal Conjugate Vaccine Introduction: A Pooled Analysis of Multiple Surveillance Sites
Source: PubMed Central journal article supplement (PMC3782411; doi:10.1371/journal.pmed.1001517), 2013-09-24

Figure S4. Vaccine serotype (VT) meningitis summary rate ratios from random effects meta-analysis for adults aged  $\geq 65$  years.

### Persons $\geq 65$ y: VT Serotypes

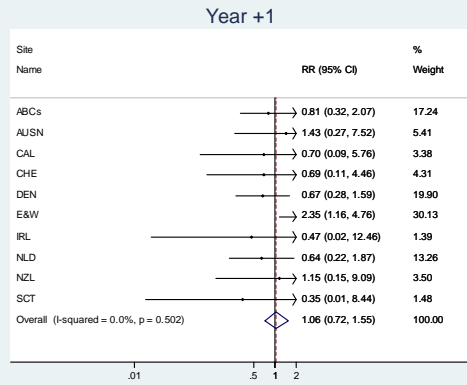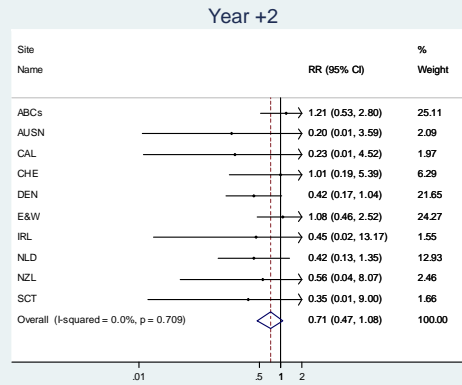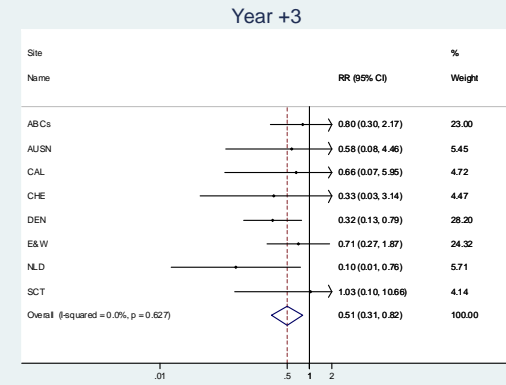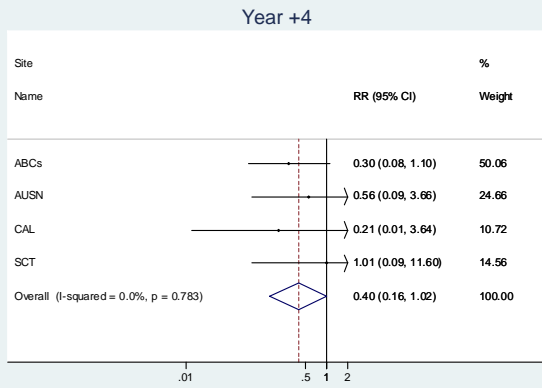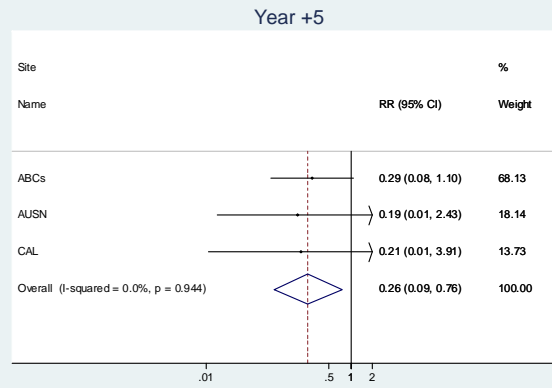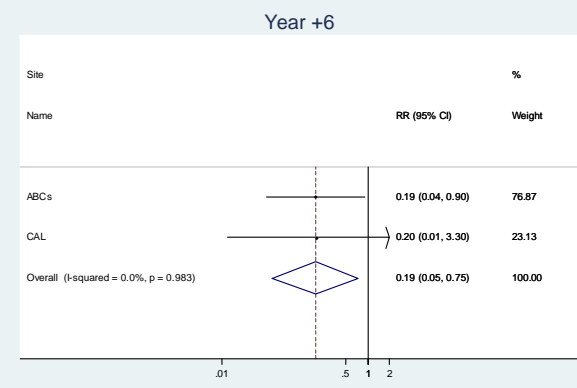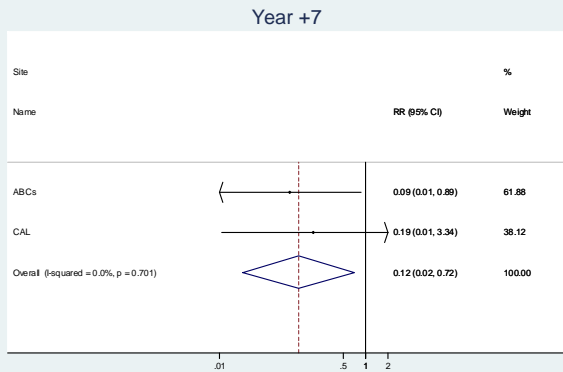

Supplement: pmed.1001517.s004.pdf [file pmed.1001517.s004.pdf]
