# Supplementary material for: Serotype-Specific Changes in Invasive Pneumococcal Disease after Pneumococcal Conjugate Vaccine Introduction: A Pooled Analysis of Multiple Surveillance Sites
Source: PubMed Central journal article supplement (PMC3782411; doi:10.1371/journal.pmed.1001517), 2013-09-24

Figure S6. Non-vaccine serotype (NVT) meningitis summary rate ratios from random effects meta-analysis for adults aged 18-49 years.

### Persons 18-49y: NVT Serotypes

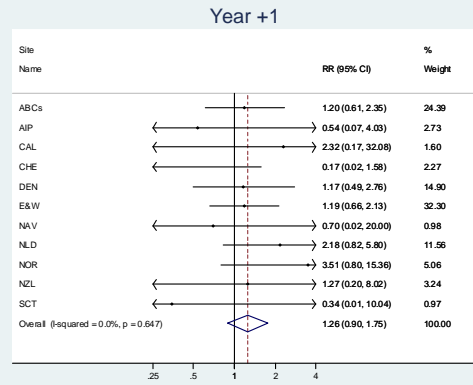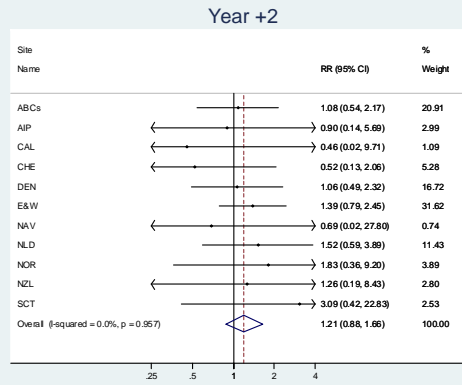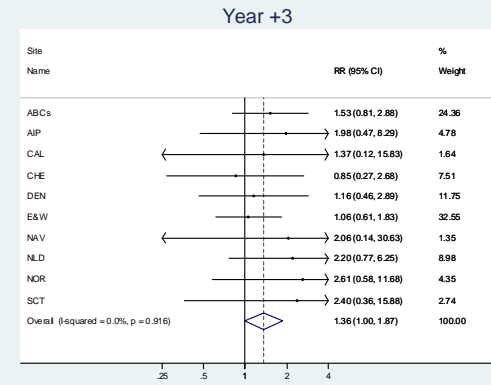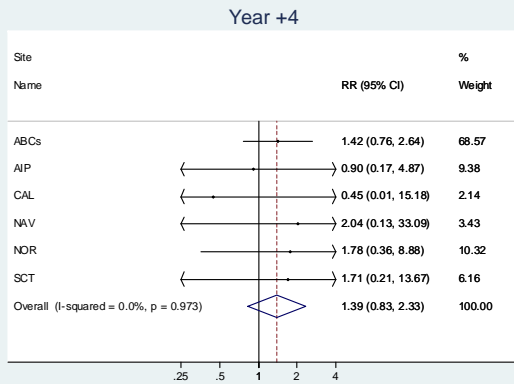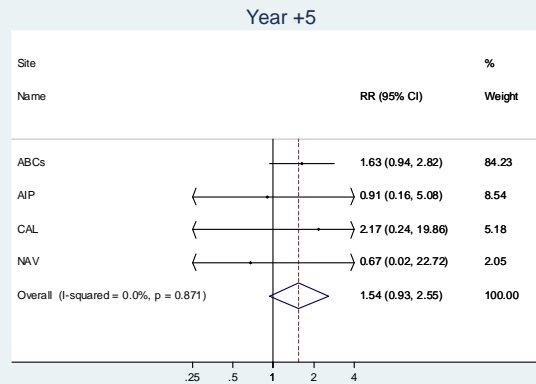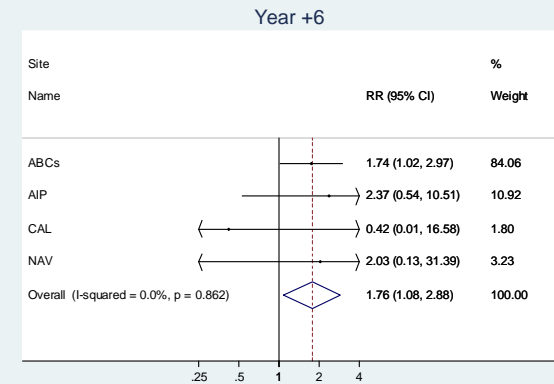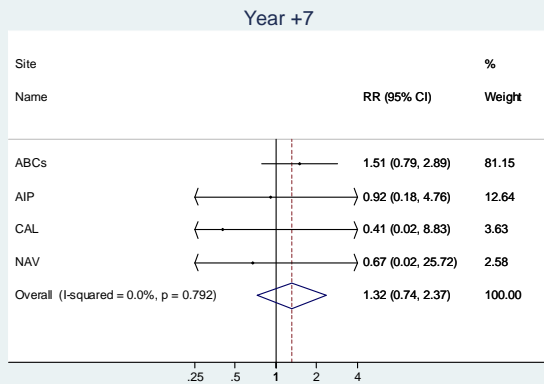

Supplement: pmed.1001517.s006.pdf [file pmed.1001517.s006.pdf]
